# Supplementary material for: Preclinical Application of CEST MRI to Detect Early and Regional Tumor Response to Local Brain Tumor Treatment
Source: MDPI journal article supplement (doi:10.3390/pharmaceutics16010101), 2024-01-12
Supplement: s1 [file s1]

## SUPPLEMENTARY DATA

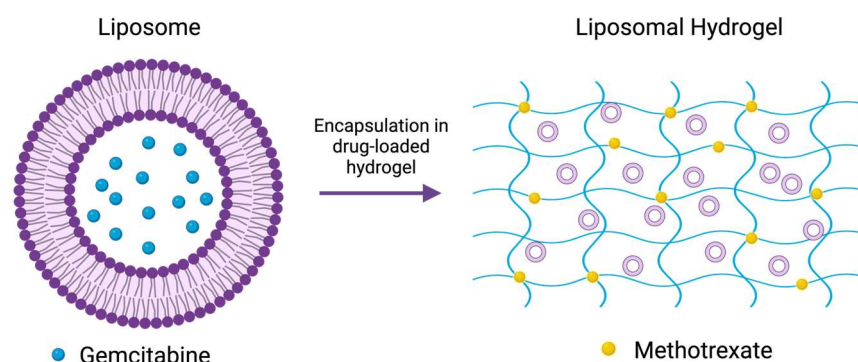

**Supplementary Figure S1.** Illustrative figure of drug loaded liposomal hydrogel.

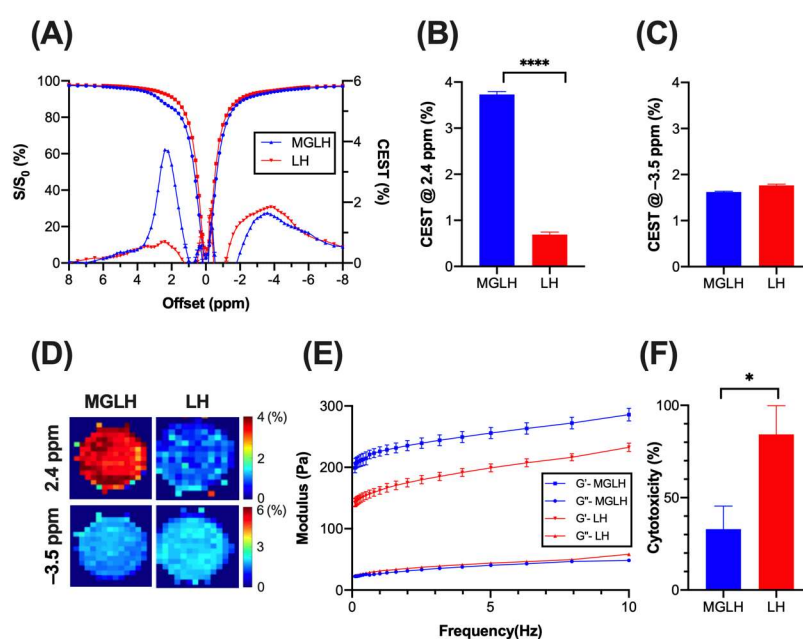

**Supplementary Figure S2.** Characteristics and CEST contrasts of MGLH and LH (n=5 per group). (A) Z-spectrum (left y-axis) and corresponding CEST signal (right y-axis). CEST contrast at (B) 2.4 ppm and at (C) -3.5 ppm and (D) corresponding CEST maps. (Data were presented as mean  $\pm$  SEM. \*\*\*\*P<0.0001, Two-tailed t-test) (E) Frequency sweep measurements of liposomal hydrogels. (F) Cytotoxicity test between MGLH and LH (n=5 per group). (\*P<0.05, Two-tailed t-tests)

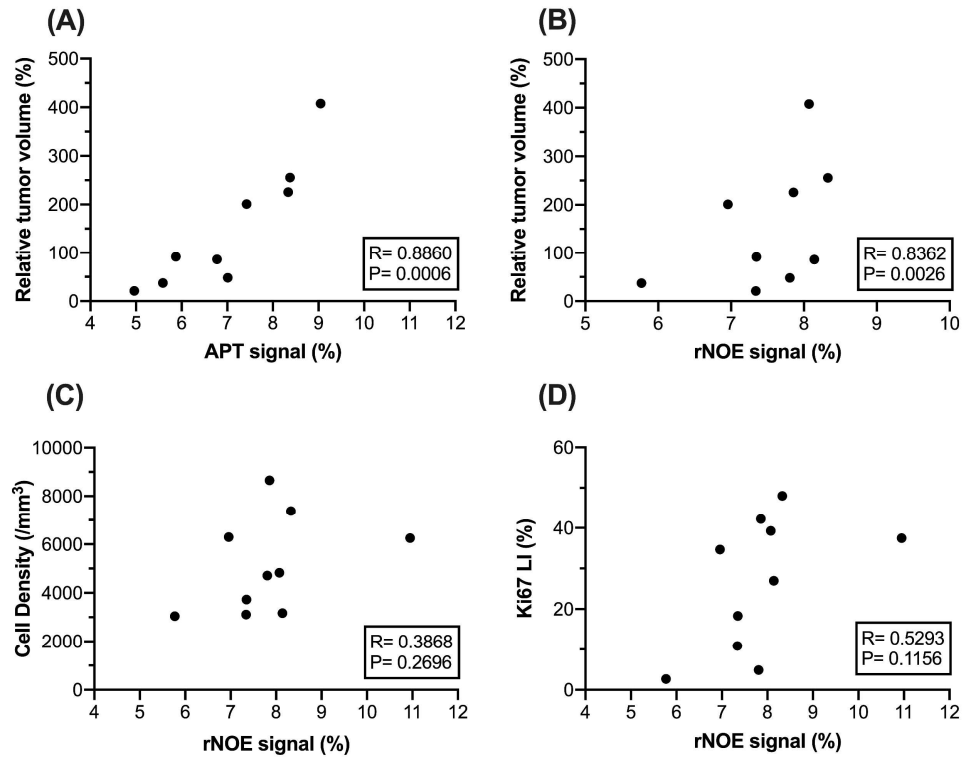

**Supplementary Figure S3.** Correlations of CEST signals. (A) Correlation between APT signal with relative tumor volume. Correlation between rNOE signal with (B) relative tumor volume, (C) cell density and (D) Ki-67. (n=10). Cell proliferation (%) was calculated based on number of Ki-67 positive cells/ number of nucleus  $\times 100$  (%).

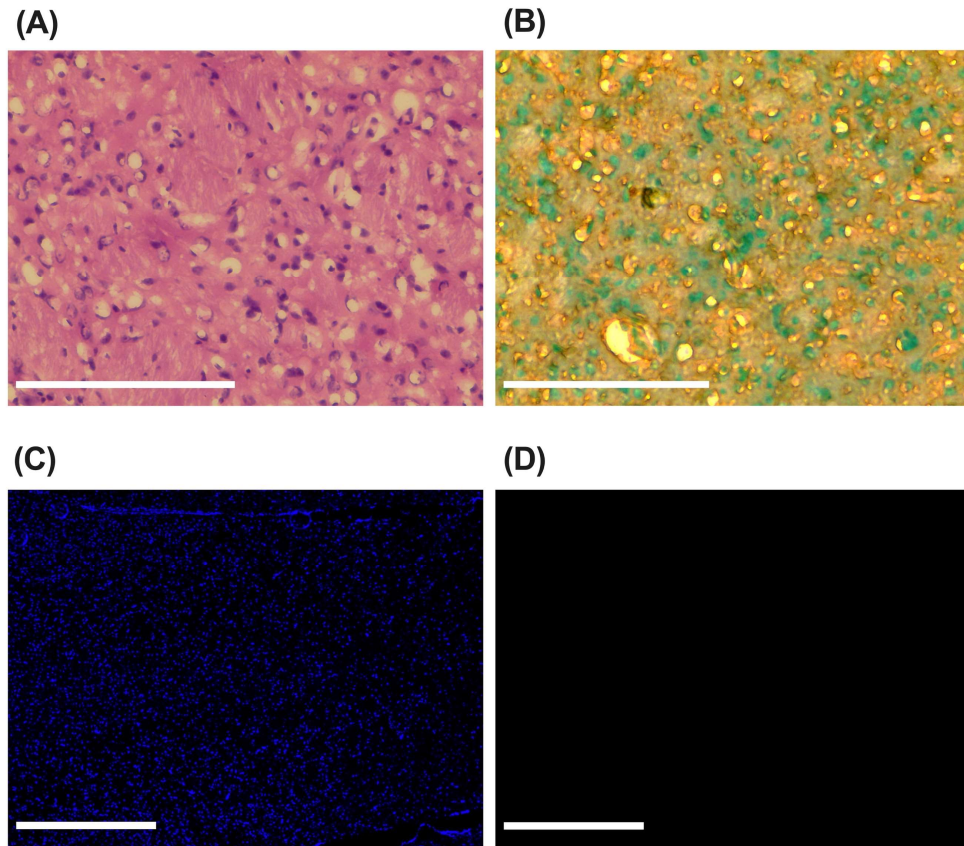

**Supplementary Figure S4.** The histopathologic analysis of the contralateral region in the treatment group. (A) H&E, (B) TUNEL, (C) DAPI and (D) Ki-67 staining. (Scale bar = 200  $\mu$ m).

| Liposome formulation (DPPC: Chol: PEG) | Size of Liposome (nm) | PDI             | EE (%)         | Concentration (particles/ ml)    |
|----------------------------------------|-----------------------|-----------------|----------------|----------------------------------|
| Chol-30 (68.7: 30: 1.3)                | 245.6 $\pm$ 1.8       | 0.32 $\pm$ 0.01 | 60.1 $\pm$ 0.1 | 2.64 $\pm$ 0.40 $\times 10^{16}$ |
| Chol-70 (28.8: 70: 1.3)                | 210.1 $\pm$ 2.2       | 0.13 $\pm$ 0.01 | 84.2 $\pm$ 0.2 | 2.63 $\pm$ 0.42 $\times 10^{16}$ |

**Supplementary Table S1.** Characteristics of the liposome formulation with different molar ratio of cholesterol (n=3 per group). Size of liposome, polydispersity index (PDI) and encapsulation efficiency (EE%)

| Time-points | APT (%)         |         |                 | rNOE (%)        |         |                 |
|-------------|-----------------|---------|-----------------|-----------------|---------|-----------------|
|             | Treatment       | P value | Control         | Treatment       | P value | Control         |
| Day 1       | 7.69 $\pm$ 0.34 | 0.3010  | 8.57 $\pm$ 0.57 | 7.98 $\pm$ 0.36 | 0.6929  | 8.43 $\pm$ 0.79 |
| Day 3       | 7.29 $\pm$ 0.71 | 0.0249  | 9.23 $\pm$ 0.63 | 8.22 $\pm$ 0.69 | 0.6827  | 8.69 $\pm$ 0.87 |
| Day 5       | 6.53 $\pm$ 0.79 | 0.0052  | 8.98 $\pm$ 0.67 | 5.94 $\pm$ 0.48 | 0.0373  | 8.38 $\pm$ 1.14 |
| Day 7       | 6.52 $\pm$ 0.68 | 0.0339  | 8.41 $\pm$ 0.54 | 6.83 $\pm$ 0.94 | 0.3500  | 7.94 $\pm$ 1.03 |
| Day 10      | 6.04 $\pm$ 0.38 | 0.0062  | 8.63 $\pm$ 0.42 | 7.28 $\pm$ 0.41 | 0.3552  | 8.43 $\pm$ 0.67 |

**Supplementary Table S2.** Mean  $\pm$  SEM and P value of CEST signals of tumor in the treatment (n=5) and control group (n=5-7). (Two-Way ANOVA)

|                  | APT (%)     | rNOE (%)    | Ki-67 (%)    | TUNEL (%)    | Non-proliferating &<br>non-apoptotic cells<br>(%) |
|------------------|-------------|-------------|--------------|--------------|---------------------------------------------------|
| Distal           | 5.91 ± 0.59 | 7.14 ± 0.36 | 29.06 ± 6.10 | 53.67 ± 5.21 | 17.28 ± 8.98                                      |
| Core             | 5.79 ± 0.52 | 6.96 ± 0.34 | 14.41 ± 4.91 | 71.00 ± 1.00 | 14.59 ± 4.01                                      |
| Near<br>Hydrogel | 5.39 ± 0.65 | 7.14 ± 0.63 | 9.32 ± 5.94  | 78.00 ± 1.53 | 12.68 ± 5.53                                      |

**Supplementary Table S3.** CEST signals, Ki-67 positive and TUNEL positive within three tumor subregions (n=3 per group). (One-Way ANOVA)
